# Supplementary material for: Epigenetic Inactivation of SOX30 Is Associated with Male Infertility and Offers a Therapy Target for Non-obstructive Azoospermia
Source: PubMed Central journal article supplement — Mol Ther Nucleic Acids. 2019 Nov 14;19:72–83. doi: 10.1016/j.omtn.2019.10.038 (PMC6926170; doi:10.1016/j.omtn.2019.10.038), 2019-11-14

| <b>Group</b> | <b>Total_dmrs</b> | <b>DMR_ave_length</b> | <b>DMR_ave_CGs</b> | <b>dmrs_promoter</b> | <b>dmr_genes-promoter</b> | <b>dmrs_genebody</b> | <b>dmr_genes-genebody</b> |
|--------------|-------------------|-----------------------|--------------------|----------------------|---------------------------|----------------------|---------------------------|
| A-vs-B       | 5832              | 236                   | 11                 | 400                  | 614                       | 2237                 | 3709                      |

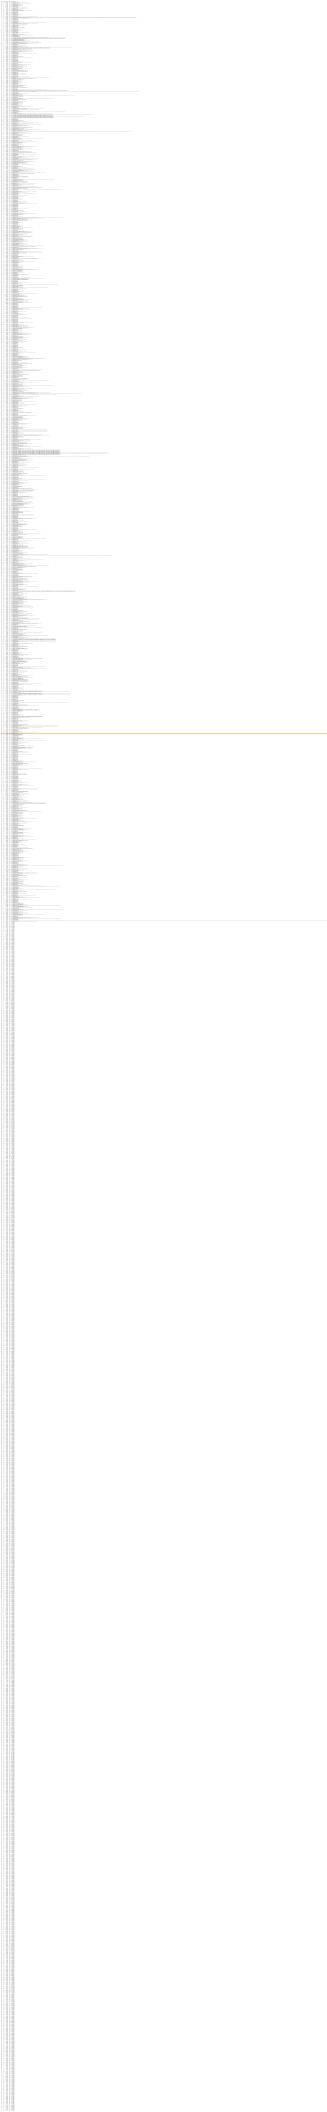

Supplement: mmc3.pdf [file mmc3.pdf]
